# Supplementary material for: Preliminary Free Energy Map of Prebiotic Compounds Formed from CO2, H2 and H2S
Source: MDPI journal article supplement (doi:10.3390/life12111763), 2022-11-02
Supplement: s1 [file s1]

Supplementary Materials for:

**Preliminary Free Energy Map of Prebiotic Compounds formed from CO<sub>2</sub>, H<sub>2</sub> and H<sub>2</sub>S**

**Jeremy Kua \* and Nicole A. Miller**

Department of Chemistry & Biochemistry, University of San Diego, San Diego, CA 92110, U.S.A.

\* Correspondence: jkua@sandiego.edu (J.K.)

Part 1: Reaction schemes to form other dithiopentoses

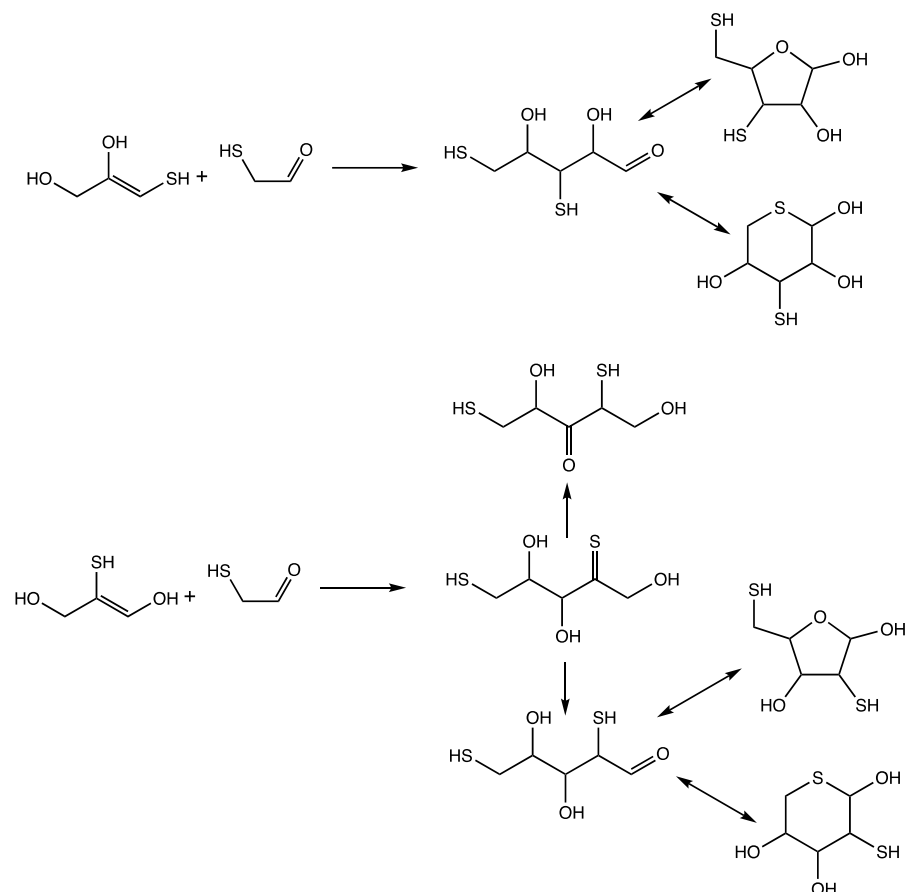

**Figure S1a.** C<sub>3</sub> enol + C<sub>2</sub> aldehyde aldol additions to form dithiopentoses

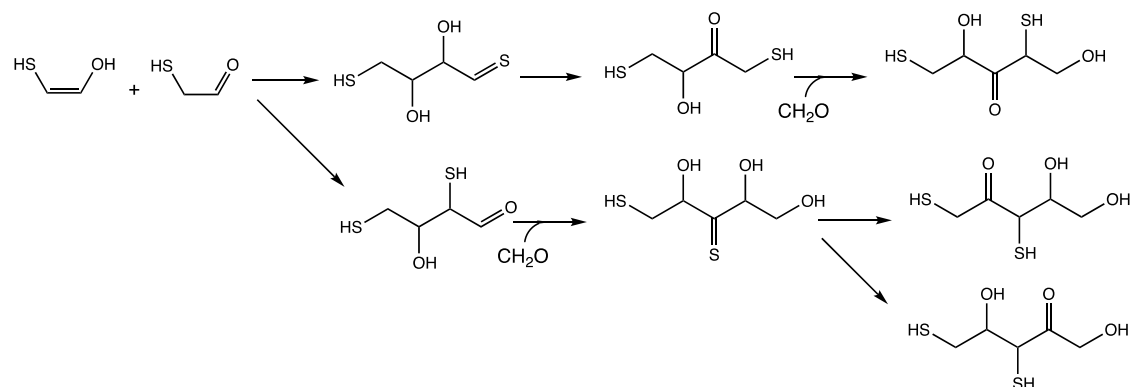

**Figure S1b.** Mercaptoaldehyde aldol dimerization followed by addition of CH<sub>2</sub>O to form dithiopentoses

Part 2:  $G_{r0}$  values for zero-oxidation dehydrated  $C_3$  compounds and its analogs.

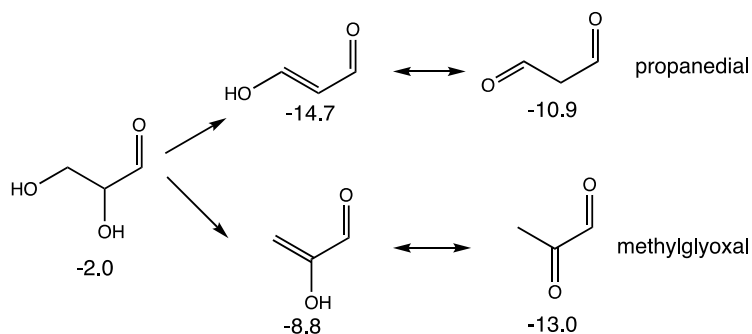

**Figure S2a.** Dehydration of glyceraldehyde to propanedial and methylglyoxal ( $G_{r0}$  in kcal/mol)

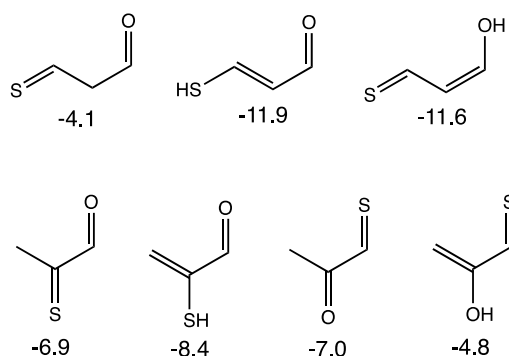

**Figure S2b.** Sulfur analogs of the dehydrated  $C_3$  compounds ( $G_{r0}$  in kcal/mol)

Part 3: Additional Transition State Structures

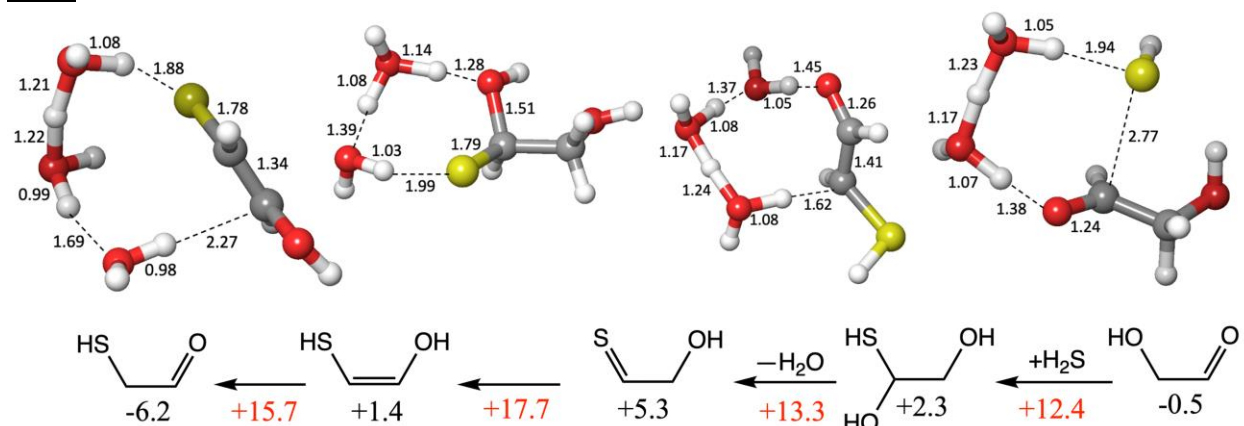

**Figure S3.** Transition State structures for conversion of glycolaldehyde to mercaptoacetaldehyde
